# Supplementary material for: Anisotropy-Dominated Topological Transitions for Photonic Crystals
Source: Research Square preprint supplement (doi:10.21203/rs.3.rs-7923395/v1), 2025-10-23
Supplement: Supplementary file 1 [file 63c3af9110749c3776c709be.docx]

Supplementary information
Anisotropy-Dominated Topological Transitions for Photonic Crystals

**Jiawei Wang1,2, Fengliang Dong1,2* & Weiguo Chu1,2***

1Nanofabrication Laboratory, National Center for Nanoscience and Technology, Beijing 100190, PR China.

2Center of Materials Science and Optoelectronics Engineering, University of Chinese Academy of Sciences, Beijing 100049, PR China.

E-mail: [dongfl@nanoctr.cn](mailto:dongfl@nanoctr.cn); [wgchu@nanoctr.cn](mailto:wgchu@nanoctr.cn)

I Theoretical deduction

a. Mathematical formulation

To precisely determine topological phase transitions, we employ the plane wave expansion method 1-3 to calculate the band structures of 2D silicon-air photonic crystals (*E*-polarization), extract critical frequencies, and refine transition points via gradient descent.

The behavior of the transverse magnetic (TM) mode of light can be expressed as

Expand *ε*-1(***r***) and *Ez*(***r***) in the form of plane waves:

Substituting equation (2) into equation (1) yields the following eigenequation:

The dielectric function depends on the spatial distribution of pillars, as shown in Fig. 1c in the main text, and *ε*(*r*) is taken as the general form

the transformation factor of *ε*-1(*r*) for geometric regions can be expressed:

Where *fn*is the filling ratio; *S*0 is the area of unit cell. For the system composed of anisotropic pillars, the dielectric function is described as:

Here *ε*1 and *ε*2 are the dielectric constants for air and silicon, respectively.

The rotation angle *θ*2 for Kramers degeneracy can be determined by

where *i* is the iteration number*.* The parameter *h* affects the convergence and the accuracy of the algorithm.

b. Elliptical pillars

For elliptical pillars, *Oi* denotes the elliptic region where *Mi*,*n* are the second-order moments;

where *θ*1, *θ*2 are the hexagonal arrangement angle and the rotation angle, respectively, *ξn*=(*xn*,*yn*)T is the coordinates of (*xn*,*yn*) as shown in the following table.

**Table S1 Coordinates of (*xn*,*yn*) for elliptical pillars**

| **Number** | **1** | **2** | **3** | **4** | **5** |
| --- | --- | --- | --- | --- | --- |
| **Position** | (*x-R,y*) | (*x-*a*+R,y*) | (*x-*a/2-*R, y*-√3*R*/2) | (*x-*3a/2+*R, y*-√3a/2) | (*x-R*/2*, y*-√3*R*/2) |
| **Number** | **6** | **7** | **8** | **9** | **10** |
| **Position** | (*x-*(a*-R*)/2*, y*-√3(a-*R)*/2) | (*x-*a*-R*/2*, y*-√3*R*/2) | (*x-*3a/2*-R*/2*, y*-√3(a-*R*)/2) | (*x-*a+*R, y*-√3(a-*R*)/2) | (*x-*a+*R*/2*, y*-√3*R*/2) |

c. Rectangular pillars

For rectangular pillars,

Where *l* and *s* are the length and width of a rectangular pillar, respectively.

Fig. S1 shows the TM-mode dispersions of the PhCs composed of elliptical (l=134 nm, s=44 nm) and rectangular pillars (l=238 nm, s=78 nm), respectively, for Kramers degeneracy with θ2=43.5˚. To check the effect of *h* on convergence and accuracy, we set different *h* values upon determining the topological transition angle using equation (8). Fig. S2 shows the results for *h*=0.5, 0.3, and 0.1. For the three cases, the calculation converges after 101, 114 and 141 iterations, respectively, and the deviation of the topological transition angle is merely 0.01˚, indicating the high efficiency and stability of calculations.


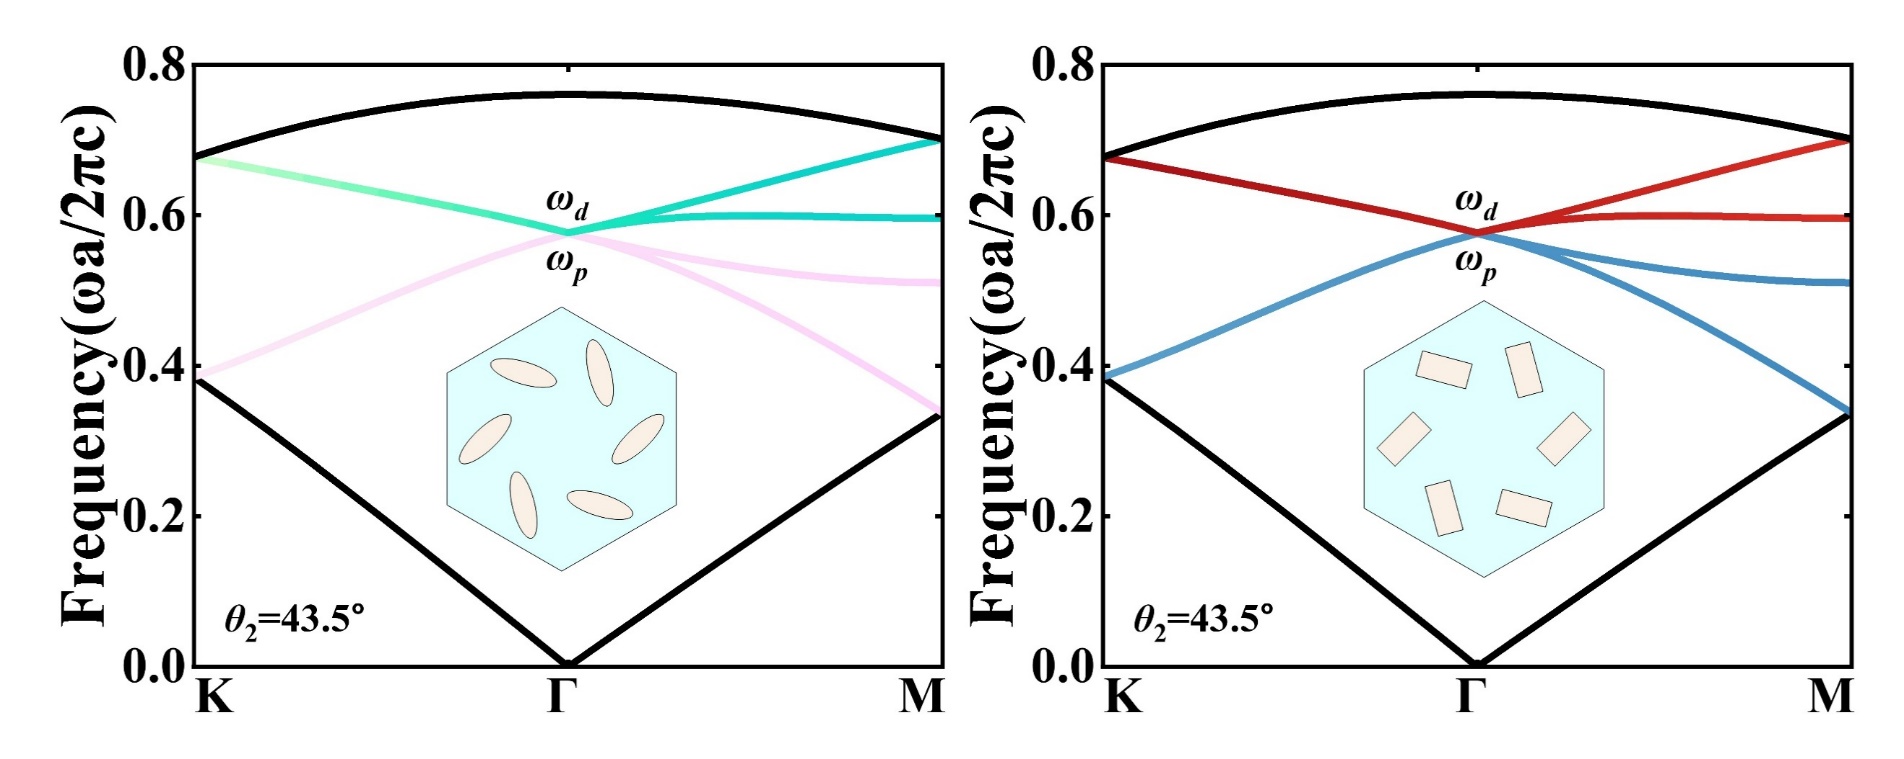


**Figure S1 | TM-mode dispersions of PhCs** **composed of elliptical (*l*=134 nm, *s*=44 nm) and rectangular pillars (*l*=238 nm, *s*=78 nm), respectively, for Kramers degeneracy.**


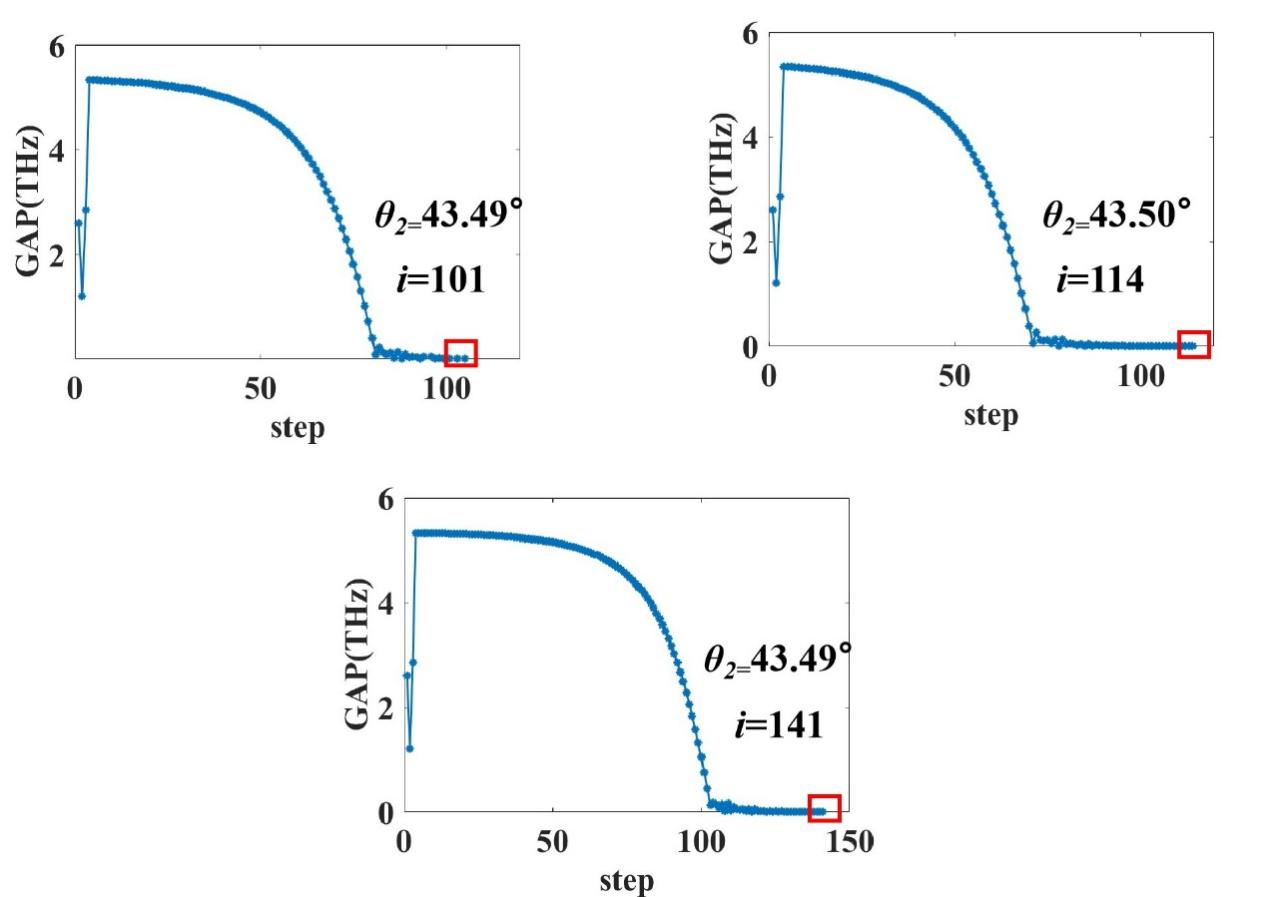


**Figure S2 | Convergence of the calculations of the topological transition angles for *h*=0.5, *h*=0.3, and *h*=0.1.**


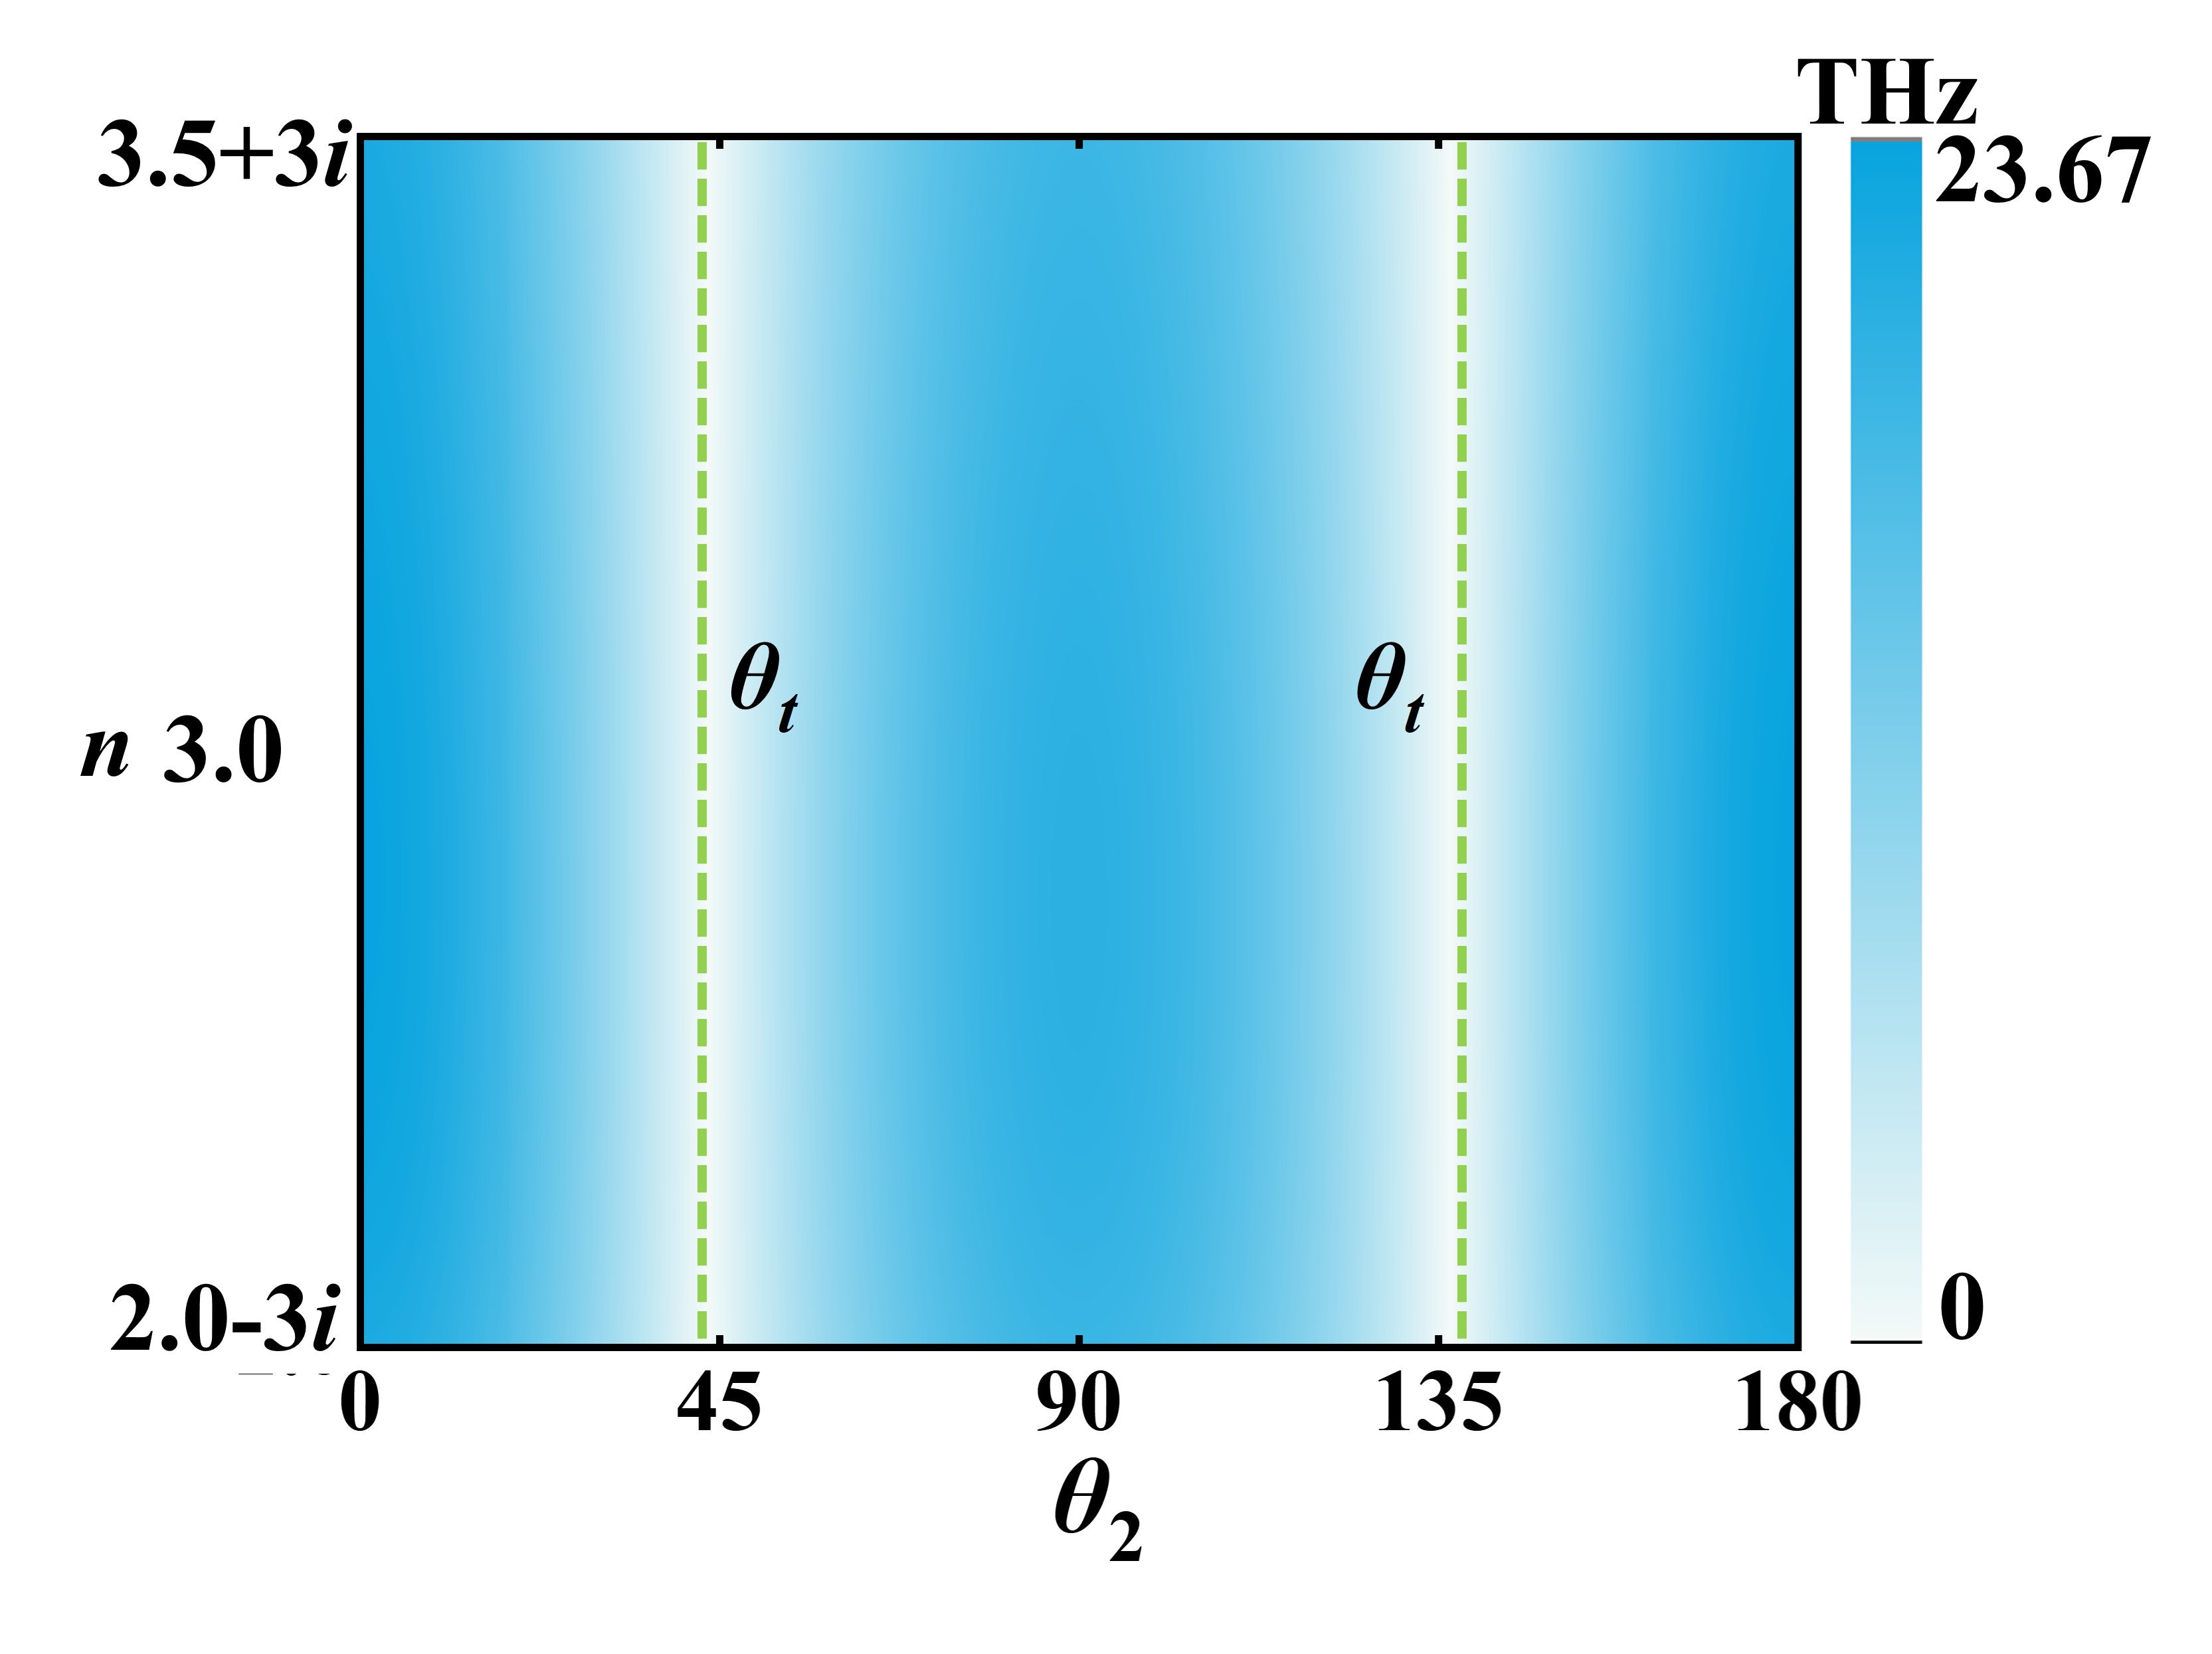


**Figure S3 | Refractive index dependence of the transition angles in a general case (A+iB with 2.0≤A≤3.5 and -3≤B≤3.0).**

d. Wilson loop

For a topological system with a spin DOF, the Wilson loop can be adopted for classification of different topological properties. To calculate the Wilson loop, we discretize the first Brillouin zone (BZ) along the reciprocal lattice vectors at first. Then, the loop can be calculated at each discretized *k* point4, for isolated bands. Along the lattice vectors a1, it can be obtained using5

Here, *Ukα→Ukβ*=||< *Ukα*| *Ukβ*>||, and < *Ukα*| *Ukβ*>=**∫***ε*(*r*) *Ukα**(*r*) *Ukβ*(*r*)*d*2r**·***uk*(*r*) is calculated by Finite Difference (FD) solver. For the degenerated bands, the Wilson loop is calculated using

where the superscript *n* means the degenerated band index. For our system, the calculated results are symmetrical about zero, and the Wannier centers of the Wilson loops are localized at the edge of the unit cell (*W*= ±π), which verifies the topological nature.

II Results

a. Propagation of edge states along the interface composed of two different pillars

**Figure S4.** **Propagation of light excited by *S*+ /*S*− along the Ω-shaped interface composed of elliptical pillars** **(*****l*=134 nm, *s*=44 nm, *θ*2=0°) and rectangular pillars (*l*=238 nm, *s*=78 nm, *θ*2=87°).**

b. Propagation of edge states along the interface composed of elliptical pillars with differing rotation angles, two different angle structures and different topological protection domain walls

**Figure S5 | Propagation of light excited by *S*+ /*S*− along the Ω-shaped interface composed of elliptical pillars *(l*=134 nm, *s*=44 nm) with *θ*2=14°and79°, respectively.**

**Figure S6 |** **Propagation of light excited by *S*+ /*S*− along the vertical interface composed of elliptical pillars (*l*=134 nm, *s*=44 nm) with *θ*2=15° and 75°, respectively. .**

c. Fragile topology

**Figure S7 | Calculated Wilson loop and** **Fragile topology. a,** The Wilson loop spectra for PhCs composed of elliptical pillars (*l*=134 nm, *s*=44 nm) with *θ*2=0°. The Wilson loop spectrum for the isolated Band 1 is fixed at 0, and the Wilson loop spectrum for Band 2&3 winds in opposite directions from −π to π as a function of momentum. The winding is guaranteed by the C2 eigenvalues of the bands, and indicates the nontrivial topology. The Wilson loop spectrum for all the bands has no winding from -π to +π. **b,** The Wilson loop spectra for PhCs composed of elliptical pillars (*l*=134 nm, *s*=44 nm) with *θ*2=87°. The absence of winding from −π to π indicates the trivial topology.

1 Alagappan, G., Sun, X. W. & Sun, H. D. Symmetries of the eigenstates in an anisotropic photonic crystal. *Physical Review B* **77**, doi:10.1103/PhysRevB.77.195117 (2008).

2 Hsue, Y.-C., Freeman, A. J. & Gu, B.-Y. Extended plane-wave expansion method in three-dimensional anisotropic photonic crystals. *Physical Review B* **72**, doi:10.1103/PhysRevB.72.195118 (2005).

3 Nicomedes, W., Mesquita, R. & Moreira, F. Calculating the Band Structure of Photonic Crystals Through the Meshless Local Petrov-Galerkin (MLPG) Method and Periodic Shape Functions. *IEEE Transactions on Magnetics* **48**, 551-554, doi:10.1109/tmag.2011.2175206 (2012).

4 *Journal of Open Source Software*, doi:10.21105/joss.

5 Brouder, C., Panati, G., Calandra, M., Mourougane, C. & Marzari, N. Exponential localization of Wannier functions in insulators. *Physical Review Letters* **98**, 046402, doi:10.1103/PhysRevLett.98.046402 (2007).
